# Supplementary material for: Land Use Land Cover Change and its Impact on Wetland Habitats and Associated Ecosystem Services in the Central Highland of Ethiopia
Source: Research Square preprint supplement (doi:10.21203/rs.3.rs-6714657/v1), 2025-07-18
Supplement: Supplementary file 1 [file ca52565c0ab2c39c7da9d839.docx]

**Table S1**. Land use land cover classification accuracy of 2023

| LULC type | User Accuracy | Producer Accuracy |
| --- | --- | --- |
| Water body | 90 | 90 |
| Forest land | 80 | 73 |
| Farm land | 90 | 82 |
| Built up area | 100 | 91 |
| Wetland area | 80 | 89 |
| Bare land | 80 | 100 |
| Overall classification accuracy (%) | 86.7 | |
| Overall kappa statistics | 0.84 | |

**Table S2**. LULC change matrices for 2003-2013, 2013-2023, and 2003-2023 in the study area

| (a) Conversion matrices from 2003 to 2013 | | | | | | | | | |
| --- | --- | --- | --- | --- | --- | --- | --- | --- | --- |
| LULC type | | Final year (2013) | | | | | | | |
| Water body | Forest land | Farm land | Built up area | Wetland | Bare land | Row total | Area loss |
|
| Initial year (2003) | Water body | **3783.8** | 1.4 | 357.2 | 0.0 | 2256.1 | 96.6 | 6495.0 | 2711.2 |
| Forest land | 7.4 | **29312.4** | 5134.1 | 1018.0 | 1173.4 | 27.8 | 36673.0 | 7360.7 |
| Farm land | 4.9 | 5821.1 | **742805.3** | 9198.1 | 36016.0 | 1649.7 | 795495.0 | 52689.7 |
| Built up area | 232.4 | 30.4 | 3898.4 | **12686.7** | 20.2 | 74.0 | 16942.1 | 4256.1 |
| Wetland | 852.6 | 5404.2 | 38362.4 | 23.6 | **4148.4** | 34.3 | 48825.5 | 44677.1 |
| Bare land | 0.1 | 0.1 | 9381.2 | 382.2 | 301.2 | **10127.7** | 20192.4 | 10064.7 |
| Column total | 4881.2 | 40569.5 | 799938.4 | 23308.6 | 43915.3 | 12010.0 | **924623.0** | **121759.5** |
| Area gain | 1097.4 | 11257.1 | 57133.8 | 10621.9 | 39766.9 | 1882.3 | **121759.5** |  |
| (b) Conversion matrices from 2013 to 2023 | | | | | | | | | |
|  | LULC type | Final year (2023) | | | | | | | |
| Initial year (2013) | Water body | **3072.2** | 10.4 | 171.1 | 38.1 | 831.3 | 758.1 | 4881.2 | 1809.0 |
| Forest land | 26.7 | **28960.5** | 11480.2 | 1.7 | 100.3 | 0.1 | 40570.0 | 11609.5 |
| Farm land | 171.4 | 10797.0 | **777122.9** | 9673.9 | 1178.3 | 995.0 | 799938.5 | 22815.6 |
| Built up area | 15.9 | 15.8 | 886.1 | **21564.3** | 295.8 | 530.8 | 23308.1 | 1743.8 |
| Wetland | 0.2 | 2441.6 | 36895.5 | 62.3 | **3685.7** | 830.0 | 43915.3 | 40229.6 |
| Bare land | 7.5 | 0.7 | 8162.3 | 15.7 | 8.7 | **3815.1** | 12010.0 | 8194.9 |
| Column total | 3294.0 | 42226.0 | 834718.0 | 31356.0 | 6100.0 | 6929.0 | **924623.0** | **86402.3** |
| Area gain | 221.8 | 13265.5 | 57595.1 | 9791.7 | 2414.3 | 3113.9 | **86402.3** |  |
| (c) Conversion matrices from 2003 to 2023 | | | | | | | | | |
|  | LULC type | Final year (2023) | | | | | | | |
| Initial year (2003) | Water body | **2348.0** | 1203.8 | 773.2 | 70.9 | 867.1 | 1232.0 | 6495.0 | 4147.0 |
| Forest land | 122.9 | **27499.5** | 6276.5 | 739.7 | 546.8 | 1488.0 | 36673.0 | 9173.5 |
| Farm land | 176.7 | 3218.7 | **786724.0** | 5081.9 | 165.2 | 128.5 | 795495.0 | 8771.0 |
| Built up area | 41.8 | 1.4 | 4796.1 | **11747.9** | 219.2 | 135.7 | 16942.1 | 5194.2 |
| Wetland | 501.5 | 9063.3 | 21097.9 | 13674.4 | **4065.0** | 423.4 | 48825.4 | 44760.4 |
| Bare land | 103.2 | 1239.5 | 15050.3 | 41.3 | 236.5 | **3521.3** | 20192.4 | 16671.1 |
| Column total | 3294.0 | 42226.0 | 834718.0 | 31356.0 | 6100.0 | 6929.0 | **924623.0** | **88717.2** |
| Area gain | 946.0 | 14726.5 | 47994.0 | 19608.1 | 2035.0 | 3407.7 | **88717.2** |  |
